# Supplementary material for: Cerebral organoids containing an AUTS2 missense variant model microcephaly
Source: Oxford University Press journal article supplement (doi:10.1093/brain/awac244), 2022-07-08
Supplement: awac244_supplementary_data.zip [file awac244_supplementary_data.zip]

Archive with 2 entries (2 files):
- brain-2021-01771-File009.pdf
- brain-2021-01771-File010.pdf
