# Supplementary material for: Cerebral organoids containing an AUTS2 missense variant model microcephaly
Source: Oxford University Press journal article supplement (doi:10.1093/brain/awac244), 2022-07-08
Supplement: awac244_supplementary_data.zip [file awac244_supplementary_data.zip › brain-2021-01771-File009.pdf]

**Supplementary Table 1.** Whole-genome sequencing metrics for the family trio.

| Sample  | Read Length | Total Seq. (Gbp) | Map Rate | Dup. Rate | Mean Depth | Cov>=20x |
|---------|-------------|------------------|----------|-----------|------------|----------|
| Proband | 150         | 138.3            | 97.6%    | 7.6%      | 39.07x     | 96.50%   |
| Mother  | 150         | 141.0            | 96.9%    | 8.9%      | 39.62x     | 96.80%   |
| Father  | 150         | 279.3            | 49.3%    | 10.1%     | 39.26x     | 95.30%   |

**Supplementary Table 2.** Primary antibodies used for immunofluorescence studies.

| Antibody                      | Full Name                                                                                 | Description                           | Vendor                    | Catalog #    | Species | Dilution     |
|-------------------------------|-------------------------------------------------------------------------------------------|---------------------------------------|---------------------------|--------------|---------|--------------|
| <b>NANOG</b>                  | Homeobox Transcription Factor Nanog                                                       | Pluripotency marker                   | R&D Sys.                  | AF1997       | Gt      | 1:200        |
| <b>TPX2</b>                   | TPX2 Microtubule Nucleation Factor                                                        | Mitotic spindle assembly factor       | Novus                     | NB500-179    | Rb      | 1:200        |
| <b>pHH3</b>                   | Phospho-Histone H3                                                                        | M-phase specific proliferation marker | Millipore                 | 06-570       | Rb      | 1:500        |
| <b>ARL13B</b>                 | ADP Ribosylation Factor Like GTPase 13B                                                   | Cilia marker                          | Proteintech               | 17711-1-AP   | Rb      | 1:200        |
| <b>ZO1</b>                    | Tight Junction Protein 1                                                                  | Apical zone marker                    | BD Biosciences            | 610966       | Ms      | 1:300        |
| <b>SOX2</b>                   | SRY-Box 2                                                                                 | Neural progenitor cell marker         | Santa Cruz                | sc-17320     | Gt      | 1:200        |
| <b>SSEA4</b>                  | Stage-Specific Embryonic Antigen-4                                                        | Pluripotency marker                   | Millipore                 | MAB4304      | Ms      | 1:200        |
| <b>LIN28</b>                  | LIN-28 family RNA-binding protein                                                         | Pluripotency marker                   | ThermoFisher              | PA1-096      | Rb      | 1:100        |
| <b>OCT3/4</b>                 | Octamer-Binding Protein 4                                                                 | Pluripotency marker                   | Santa Cruz                | SC-8628      | Gt      | 1:200        |
| <b>AUTS2</b>                  | Autism Susceptibility Candidate 2/ Activator of Transcription and Developmental Regulator | Transcriptional regulator protein     | Sigma                     | HPA000390    | Rb      | 1:200        |
| <b>AUTS2 blocking peptide</b> | PrEST Antigen AUTS2                                                                       | AUTS2 blocking peptide (30kDA)        | Santa Cruz                | APREST76 148 | N/A     | 1:100, 1:200 |
| <b>TBR2</b>                   | T-Box, Brain 2                                                                            | Intermediate progenitor (IP) marker   | Abcam                     | Ab23345      | Rb      | 1:300        |
| <b>CC3</b>                    | Cleaved Caspase 3                                                                         | Apoptotic cell death marker           | Cell Signaling Technology | 9661S        | Rb      | 1:1000       |

Supplementary Table 3

| Sample             | Chr | Start_b38 | Stop_b38  | Ref  | Alt  | Parental iPSC Depth | Parental iPSC VAF | Gene       | Effect   | MANE HGVS                                     | gnomAD Hets | In silico Predictions |
|--------------------|-----|-----------|-----------|------|------|---------------------|-------------------|------------|----------|-----------------------------------------------|-------------|-----------------------|
| Parental iPSC line | 3   | 39391612  | 39391612  | C    | T    | 30                  | 56.7%             | SLC25A38   | missense | NM_017875.4(SLC25A38):c.448C>T:p.Arg150Cys    | 16          | 24/25 damaging        |
|                    | 4   | 163326265 | 163326265 | G    | A    | 16                  | 75.0%             | NPY1R      | missense | NM_000909.6(NPY1R):c.290C>T:p.Thr97Ile        | 0           | 20/26 damaging        |
|                    | 7   | 141470701 | 141470701 | T    | C    | 16                  | 68.8%             | TMEM178B   | missense | NM_001195278.2(TMEM178B):c.800T>C:p.Phe267Ser | 0           | 12/17 damaging        |
|                    | 10  | 60892854  | 60892854  | A    | T    | 26                  | 57.7%             | RHOBTB1    | stopgain | NM_014836.5(RHOBTB1):c.438T>A:p.Tyr146*       | 0           | 6/9 damaging          |
|                    | 14  | 64002062  | 64002062  | G    | T    | 28                  | 50.0%             | SYNE2      | missense | NM_182914.3(SYNE2):c.3767G>T:p.Arg1256Leu     | 0           | 0/26 damaging         |
|                    | 19  | 18436177  | 18436177  | T    | C    | 22                  | 36.4%             | ISYNA1     | missense | NM_016368.5(ISYNA1):c.830A>G:p.Asn277Ser      | 10          | 20/24 damaging        |
|                    | 19  | 49201994  | 49201994  | C    | T    | 21                  | 52.4%             | TRPM4      | missense | NM_017636.4(TRPM4):c.2984C>T:p.Ser995Leu      | 12          | 1/25 damaging         |
|                    | 19  | 54462691  | 54462691  | C    | T    | 29                  | 41.4%             | LENG9      | stopgain | NM_001301782.2(LENG9):c.836G>A:p.Trp279*      | 0           | 4/8 damaging          |
|                    | 20  | 31244025  | 32331112  | (2n) | (3n) |                     |                   | (30 genes) | cnv_gain |                                               |             | 1.087 Mbp gain        |

**Supplementary Table 3.** Gene variants identified in parental control iPSCs by whole-genome sequencing. Variants are shown along with coverage depth, variant allele frequency (VAF), and predicted effect according to the MANE transcript. Read depth in the matched normal (maternal blood) is not shown (mean depth 41.4x, range 34-55x, no variant alleles observed). The last two columns contain the number of individuals heterozygous for this variant in gnomAD v3.1.2, and in silico predictions from VarSome.

Supplementary Table 4

| Sample                                                                                                                                                                                                                                         | Chr | Start_b38 | Stop_b38  | Ref  | Alt  | Proband iPSC Depth | Proband iPSC VAF | GC iPSC Depth | GC iPSC VAF | Gene       | Effect        | MANE HGVS                                       | gnomAD Hets | In silico Predictions |
|------------------------------------------------------------------------------------------------------------------------------------------------------------------------------------------------------------------------------------------------|-----|-----------|-----------|------|------|--------------------|------------------|---------------|-------------|------------|---------------|-------------------------------------------------|-------------|-----------------------|
| Proband iPSC line                                                                                                                                                                                                                              | 5   | 141487392 | 141487392 | G    | A    | 21                 | 33.30%           | 21            | 47.60%      | PCDHGC4    | missense      | NM_018928.2(PCDHGC4):c.2219G>A:p.Arg740Lys      | 0           | 3/24 damaging         |
|                                                                                                                                                                                                                                                | 11  | 61518641  | 61518641  | G    | T    | 30                 | 33.30%           | 26            | 50.00%      | SYT7       | missense      | NM_001365809.2(SYT7):c.2047C>A:p.Gln683Lys      | 0           | 4/26 damaging         |
|                                                                                                                                                                                                                                                | 15  | 40337814  | 40337814  | C    | G    | 27                 | 40.70%           | 29            | 0.00%       | CCDC98     | missense      | NM_207380.3(CCDC98):c.725G>C:p.Arg242Pro        | 4           | 20/24 damaging        |
|                                                                                                                                                                                                                                                | 17  | 7673787   | 7673787   | G    | A    | 18                 | 11.10%           | 23            | 21.70%      | TP53       | missense      | NM_000546.6(TP53):c.833C>T:p.Pro278Leu          | 0           | 24/26 damaging        |
|                                                                                                                                                                                                                                                | 17  | 7674942   | 7674942   | C    | T    | 27                 | 40.70%           | 31            | 0.00%       | TP53       | missense      | NM_000546.6(TP53):c.589G>A:p.Val197Met          | 0           | 24/26 damaging        |
|                                                                                                                                                                                                                                                | 19  | 35777649  | 35777649  | G    | A    | 26                 | 61.50%           | 15            | 53.30%      | ARHGAP33   | missense      | NM_001366178.1(ARHGAP33):c.111G>A:p.Arg4His     | 1           | 15/25 damaging        |
|                                                                                                                                                                                                                                                | 19  | 38573201  | 38573201  | G    | C    | 24                 | 41.70%           | 13            | 38.50%      | RVR1       | missense      | NM_000540.3(RVR1):c.14023G>C:p.Glu4675Gln       | 0           | 23/24 damaging        |
|                                                                                                                                                                                                                                                | 20  | 5573937   | 5573937   | G    | T    | 21                 | 42.90%           | 24            | 0.00%       | GPCPD1     | missense      | NM_019592.5(GPCPD1):c.1024C>A:p.Ser345Tyr       | 0           | 20/26 damaging        |
|                                                                                                                                                                                                                                                | 20  | 64264426  | 64264426  | T    | G    | 31                 | 61.30%           | 30            | 43.30%      | PCMTD2     | splice_region | NM_018257.3(PCMTD2):c.308-3T>G                  | 0           | CADD=22, ADA=0.9891   |
|                                                                                                                                                                                                                                                | X   | 130631536 | 130631536 | C    | T    | 20                 | 40.00%           | 17            | 47.10%      | ENOX2      | missense      | NM_006375.4(ENOX2):c.1460G>A:p.Ser487Asn        | 0           | 1/22 damaging         |
| Proband 2 iPSC line <sup>1</sup> *NM_000546.6(TP53):c.589G>A:p.Val197Met (*variant not identified in this line by Sanger sequencing)                                                                                                           |     |           |           |      |      |                    |                  |               |             |            |               |                                                 |             |                       |
| GC iPSC line                                                                                                                                                                                                                                   | 1   | 4712525   | 4712525   | A    | G    | 31                 | 0.00%            | 26            | 53.90%      | AJAP1      | missense      | NM_018836.4(AJAP1):c.655A>G:p.Thr219Ala         | 255         | 1/25 damaging         |
|                                                                                                                                                                                                                                                | 1   | 39666153  | 39666153  | C    | A    | 32                 | 0.00%            | 31            | 35.50%      | NTSC1A     | missense      | NM_032526.3(NTSC1A):c.219G>T:p.Glu73Asp         | 0           | 5/25 damaging         |
|                                                                                                                                                                                                                                                | 1   | 119925735 | 119925735 | C    | A    | 27                 | 0.00%            | 29            | 51.70%      | NOTCH2     | missense      | NM_024408.4(NOTCH2):c.4081G>T:p.Ala1361Ser      | 0           | 1/25 damaging         |
|                                                                                                                                                                                                                                                | 1   | 156298892 | 156298892 | G    | A    | 39                 | 0.00%            | 34            | 47.10%      | VHL        | missense      | NM_001004319.3(VHL):c.298C>T:p.Leu100Phe        | 0           | 8/17 damaging         |
|                                                                                                                                                                                                                                                | 9   | 128984991 | 128984991 | C    | T    | 29                 | 0.00%            | 29            | 51.70%      | NUP188     | missense      | NM_015354.3(NUP188):c.2053C>T:p.Arg685Cys       | 6           | 12/26 damaging        |
|                                                                                                                                                                                                                                                | 17  | 7674202   | 7674202   | A    | C    | 14                 | 0.00%            | 23            | 60.90%      | TP53       | missense      | NM_000546.6(TP53):c.761T>G:p.Ile254Ser          | 0           | 24/26 damaging        |
|                                                                                                                                                                                                                                                | 17  | 7675182   | 7675182   | GC   | AA   | 23                 | 0.00%            | 29            | 51.70%      | TP53       | stopgain      | NM_000546.6(TP53):c.429_430delGCinsTT:p.Gln144* | 0           | truncating 144/394    |
|                                                                                                                                                                                                                                                | 22  | 40312562  | 40312562  | C    | T    | 31                 | 0.00%            | 21            | 38.10%      | TNRC6B     | missense      | NM_001162501.2(TNRC6B):c.4493C>T:p.Pro1498Leu   | 0           | 16/26 damaging        |
|                                                                                                                                                                                                                                                | 2   | 129142165 | 130367057 | (2n) | (3n) |                    |                  |               |             | (11 genes) | cnv_gain      |                                                 |             | 1.225 Mbp gain        |
| GC 2 iPSC line <sup>1</sup> *NM_000546.6(TP53):c.429_430delGCinsTT:p.Gln144* (*variant not identified in this line by Sanger sequencing)<br>**NM_000546.6(TP53):c.761T>G:p.Ile254Ser* (**variant identified in this line by Sanger sequencing) |     |           |           |      |      |                    |                  |               |             |            |               |                                                 |             |                       |

<sup>1</sup>These iPSC lines were not subjected to whole-genome sequencing.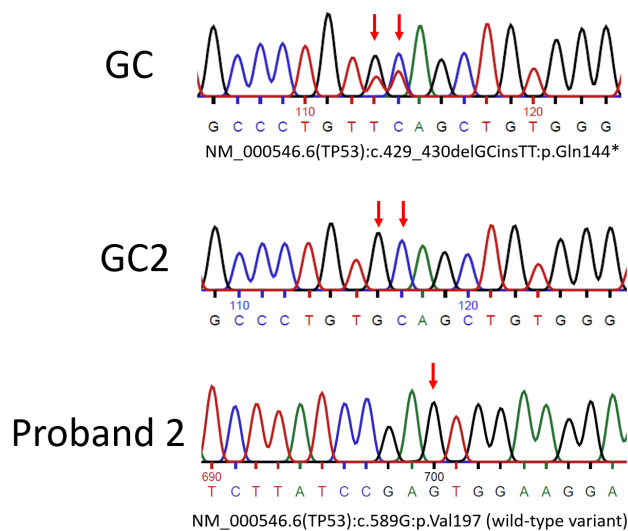

**Supplementary Table 4.** Gene variants identified in proband gene-corrected (GC) control iPSCs by whole-genome sequencing. Variants are shown along with coverage depth, variant allele frequency (VAF), and predicted effect according to the MANE transcript. Read depth in the matched normal (proband blood) is not shown (mean depth 38.8x, range 25-50x, no variant alleles observed). The last two columns contain the number of individuals heterozygous for this variant in gnomAD v3.1.2, and in silico predictions from VarSome.

**Supplementary Table 5.** sgRNA and ssODN sequences used for CRISPR/Cas9 genome editing.

|                               |                                                                                                                 |
|-------------------------------|-----------------------------------------------------------------------------------------------------------------|
| <b>Modification</b>           | P534T (CCC>ACC)                                                                                                 |
| <b>Guide RNA Sequence</b>     | TGTGCTGGTGCGTGTGCTGG                                                                                            |
| <b>Guide RNA cut location</b> | chr7:70,766,253                                                                                                 |
| <b>Donor Sequence</b>         | CGCCCTACCTGCGGACCGAGTTCCATCAGCACCAGC<br>ACCAGCACCAGCACACCCACCAACACACGCACCAG<br>CACACCTTCACGCCGTTCCCCCACGCCATCCC |

**Supplementary Table 6.** Differentially expressed genes and associated information identified in the G1/S transition of the mitotic cell cycle gene ontology.

GO:0000082: G1/S Transition of Mitotic Cell Cycle

| Gene Symbol     | Gene Description                                              | avg_logFC   | p_val     |
|-----------------|---------------------------------------------------------------|-------------|-----------|
| <i>CCND1</i>    | cyclin D1                                                     | 0.834833219 | 0         |
| <i>EIF4EBP1</i> | eukaryotic translation initiation factor 4E binding protein 1 | 0.723527514 | 0         |
| <i>CDK6</i>     | cyclin dependent kinase 6                                     | 0.617609495 | 0         |
| <i>CCND2</i>    | cyclin D2                                                     | 0.492542197 | 5.86E-163 |
| <i>BCAT1</i>    | branched chain amino acid transaminase 1                      | 0.481095388 | 1.31E-253 |
| <i>NASP</i>     | nuclear autoantigenic sperm protein                           | 0.427624671 | 5.85E-208 |
| <i>TYMS1</i>    | thymidylate synthetase                                        | 0.4169565   | 2.13E-174 |
| <i>RPS6</i>     | ribosomal protein S6                                          | 0.372833207 | 0         |
| <i>MCM7</i>     | minichromosome maintenance complex component 7                | 0.372639541 | 4.62E-152 |
| <i>GMNN</i>     | geminin, DNA replication inhibitor                            | 0.372081011 | 1.71E-159 |

**Supplementary Table 7.** Cerebral Organoid Media Formulations.

| <b>Neural Induction Media</b> |                    |               |
|-------------------------------|--------------------|---------------|
| <b>Product</b>                | <b>Vendor/</b>     | <b>Amount</b> |
|                               | <b>Catalog No.</b> |               |
| DMEM-F12                      | ThermoFisher       | 250.0 mL      |
|                               | #11320033          |               |
| MEM-NEAA                      | ThermoFisher       | 2.5 mL        |
|                               | #11140-050         |               |
| GlutaMAX Supplement           | ThermoFisher       | 2.5 mL        |
|                               | #35050061          |               |
| N-2 Supplement                | ThermoFisher       | 2.5 mL        |
|                               | #17502-048         |               |
| Anti-Anti                     | ThermoFisher       | 2.5 mL        |
|                               | #15240062          |               |

| <b>Cerebral Organoid Expansion Medium</b> |                        |               |
|-------------------------------------------|------------------------|---------------|
| <b>Product</b>                            | <b>Vendor/</b>         | <b>Amount</b> |
|                                           | <b>Catalog No.</b>     |               |
| StemCell BrainPhys™                       | Stem Cell Technologies | 250 mL        |
|                                           | #05792                 |               |
| MEM-NEAA                                  | ThermoFisher           | 1.25 mL       |
|                                           | #11140-050             |               |
| SM1 without Vitamin A                     | Stem Cell Technologies | 2.5 mL        |
|                                           | #05731                 |               |
| N-2 Supplement                            | ThermoFisher           | 1.25 mL       |
|                                           | #17502-048             |               |
| GlutaMAX Supplement                       | ThermoFisher           | 2.5 mL        |
|                                           | #35050061              |               |
| Anti-Anti                                 | ThermoFisher           | 2.5 mL        |
|                                           | #15240062              |               |
| Insulin                                   | Sigma                  | 62.5 uL       |
|                                           | #I9278                 |               |
| Matrigel                                  | Corning                | 5.0 mL        |
|                                           | #354230                |               |

| Cerebral Organoid Growth & Differentiation Media |                        |         |
|--------------------------------------------------|------------------------|---------|
| Product                                          | Vendor/                | Amount  |
|                                                  | Catalog No.            |         |
| StemCell BrainPhys™                              | Stem Cell Technologies | 250 mL  |
|                                                  | #05790                 |         |
| MEM-NEAA                                         | ThermoFisher           | 1.25 mL |
|                                                  | #11140-050             |         |
| GlutaMAX Supplement                              | ThermoFisher           | 2.5 mL  |
|                                                  | #35050061              |         |
| SM1 with Vitamin A                               | Stem Cell Technologies | 2.5 mL  |
|                                                  | #05711                 |         |
| N-2 Supplement                                   | ThermoFisher           | 1.25 mL |
|                                                  | #17502-048             |         |
| Anti-Anti                                        | ThermoFisher           | 2.5 mL  |
|                                                  | #15240062              |         |
| Insulin                                          | Sigma                  | 62.5 µL |
|                                                  | #I9278                 |         |
| <b>Dilute (1:100)</b><br>2-BME Solution          | Sigma                  | 87.5 µL |
|                                                  | #M-3148                |         |
| Matrigel                                         | Corning                | 2.5 mL  |
|                                                  | #354230                |         |
